# Supplementary material for: Highly sensitive and quantitative evaluation of the EGFR T790M mutation by nanofluidic digital PCR
Source: PubMed Central journal article supplement (PMC4653018; doi:10.18632/oncotarget.4058), 2015-05-10
Supplement: oncotarget-06-20466-s001.pdf [file oncotarget-06-20466-s001.pdf]

# Highly sensitive and quantitative evaluation of the EGFR T790M mutation by nanofluidic digital PCR

## Supplementary Material

**Supplementary Table 1.** Specificity of dPCR for detection of the T790M mutation of EGFR

| No. of WT copies | Number of positive signals in T790M reaction | Poisson regression analysis (95% CI) |
|------------------|----------------------------------------------|--------------------------------------|
| $1 \times 10^5$  | 0                                            | 0.85 to 2.64                         |
|                  | 0                                            |                                      |
|                  | 0                                            |                                      |
|                  | 3                                            |                                      |
|                  | 0                                            |                                      |
|                  | 2                                            |                                      |
|                  | 4                                            |                                      |
|                  | 3                                            |                                      |
| $1 \times 10^4$  | 0                                            |                                      |
|                  | 0                                            |                                      |
|                  | 0                                            |                                      |
| $1 \times 10^3$  | 0                                            |                                      |
|                  | 0                                            |                                      |
| $1 \times 10^2$  | 0                                            |                                      |
|                  | 0                                            |                                      |
| $1 \times 10^1$  | 0                                            |                                      |
|                  | 0                                            |                                      |

CI, confidence interval.

**Supplementary Table 2.** Detailed data for quantitative evaluation of T790M in pre-TKI and post-TKI samples by dPCR

| Pre-TKI samples  | Estimated no. of target alleles |           |                  |                                          |           |                  |                            |           |                  |
|------------------|---------------------------------|-----------|------------------|------------------------------------------|-----------|------------------|----------------------------|-----------|------------------|
|                  | Duplicate panels for control    |           |                  | Duplicate panels for activating mutation |           |                  | Duplicate panels for T790M |           |                  |
|                  | Panel (1)                       | Panel (2) | Panels (1) + (2) | Panel (1)                                | Panel (2) | Panels (1) + (2) | Panel (1)                  | Panel (2) | Panels (1) + (2) |
| 1-1-C            | 389                             | 373       | 762              | 188                                      | 212       | 400              | 57                         | 46        | 103              |
| 2-1-C            | 171                             | 158       | 329              | 5                                        | 5         | 10               | 1                          | 1         | 2                |
| 3-1-C            | 233                             | 232       | 465              | 232                                      | 222       | 454              | 12                         | 8         | 20               |
| 4-1-C            | 1221                            | 1690      | 2911             | 2338                                     | 2102      | 4440             | 36                         | 51        | 87               |
| 5-1-C            | 985                             | 916       | 1901             | 78                                       | 93        | 171              | 23                         | 33        | 56               |
| 6-1-C            | 247                             | 264       | 511              | 43                                       | 58        | 101              | 2                          | 0         | 2                |
| 7-1-C            | 701                             | 783       | 1484             | 201                                      | 247       | 448              | 1                          | 1         | 2                |
| 8-1-F            | 611                             | 513       | 1124             | 676                                      | 537       | 1213             | 5                          | 2         | 7                |
| 9-1-F            | 1491                            | 1380      | 2871             | 1202                                     | 964       | 2166             | 7                          | 3         | 10               |
| 10-1-F           | 874                             | 978       | 1852             | 1588                                     | 1596      | 3184             | 2                          | 5         | 7                |
| 11-1-F           | 729                             | 769       | 1498             | 126                                      | 106       | 232              | 6                          | 7         | 13               |
| 12-1-C           | 327                             | 331       | 658              | 25                                       | 17        | 42               | 29                         | 33        | 62               |
| 13-1-C           | 1423                            | 1321      | 2744             | 21                                       | 34        | 55               | 64                         | 107       | 171              |
| Post-TKI samples | Estimated no. of target alleles |           |                  |                                          |           |                  |                            |           |                  |
|                  | Duplicate panels for control    |           |                  | Duplicate panels for activating mutation |           |                  | Duplicate panels for T790M |           |                  |
|                  | Panel (1)                       | Panel (2) | Panels (1) + (2) | Panel (1)                                | Panel (2) | Panels (1) + (2) | Panel (1)                  | Panel (2) | Panels (1) + (2) |
| 1-2-C            | 689                             | 653       | 1342             | 22                                       | 30        | 52               | 475                        | 539       | 1014             |
| 2-2-F            | 437                             | 494       | 931              | 406                                      | 392       | 798              | 618                        | 281       | 899              |
| 3-2-C            | 418                             | 408       | 826              | 639                                      | 620       | 1259             | 244                        | 233       | 477              |
| 4-2-C            | 1062                            | 1221      | 2283             | 1257                                     | 1344      | 2601             | 1886                       | 2277      | 4163             |
| 5-2-C            | 711                             | 737       | 1448             | 284                                      | 278       | 562              | 30                         | 22        | 52               |
| 6-2-C            | 1612                            | 1852      | 3464             | 1718                                     | 1787      | 3505             | 600                        | 575       | 1175             |
| 7-2-C            | 674                             | 650       | 1324             | 42                                       | 59        | 101              | 47                         | 50        | 97               |
| 14-2-F           | 566                             | 919       | 1485             | 660                                      | 547       | 1207             | 967                        | 575       | 1542             |
| 15-2-C           | 1074                            | 1187      | 2261             | 205                                      | 200       | 405              | 3                          | 4         | 7                |
| 16-2-F           | 805                             | 758       | 1563             | 641                                      | 693       | 1334             | 494                        | 453       | 947              |
| 17-2-C           | 831                             | 721       | 1552             | 1356                                     | 1580      | 2936             | 21                         | 18        | 39               |
| 18-2-C           | 794                             | 780       | 1574             | 53                                       | 58        | 111              | 2                          | 0         | 2                |

**Supplementary Table 3.** Comparison of estimated numbers of T790M and control alleles applied to panels for detection of T790M

| Pre-TKI samples  | Input DNA (ng) applied to each panel |                                  | Estimated no. of control alleles applied to panels (1) + (2) for detection of control alleles (z) | Estimated no. of T790M alleles applied to panels (1) + (2) for detection of T790M alleles | Estimated no. of control alleles applied to panels (1) + (2) for detection of T790M alleles* |
|------------------|--------------------------------------|----------------------------------|---------------------------------------------------------------------------------------------------|-------------------------------------------------------------------------------------------|----------------------------------------------------------------------------------------------|
|                  | Panel for detection of control (x)   | Panel for detection of T790M (y) |                                                                                                   |                                                                                           |                                                                                              |
| 1-1-C            | 2.50                                 | 100.00                           | 762                                                                                               | 103                                                                                       | 30480                                                                                        |
| 2-1-C            | 44.60                                | 44.60                            | 329                                                                                               | 2                                                                                         | 329                                                                                          |
| 3-1-C            | 20.00                                | 100.00                           | 465                                                                                               | 20                                                                                        | 2325                                                                                         |
| 4-1-C            | 14.00                                | 100.00                           | 2911                                                                                              | 87                                                                                        | 20793                                                                                        |
| 5-1-C            | 14.00                                | 87.82                            | 1901                                                                                              | 56                                                                                        | 11925                                                                                        |
| 6-1-C            | 50.00                                | 100.00                           | 511                                                                                               | 2                                                                                         | 1022                                                                                         |
| 7-1-C            | 17.46                                | 17.46                            | 1484                                                                                              | 2                                                                                         | 1484                                                                                         |
| 8-1-F            | 3.00                                 | 100.00                           | 1124                                                                                              | 7                                                                                         | 37467                                                                                        |
| 9-1-F            | 7.00                                 | 100.00                           | 2871                                                                                              | 10                                                                                        | 41014                                                                                        |
| 10-1-F           | 5.00                                 | 100.00                           | 1852                                                                                              | 7                                                                                         | 37040                                                                                        |
| 11-1-F           | 4.00                                 | 100.00                           | 1498                                                                                              | 13                                                                                        | 37450                                                                                        |
| 12-1-C           | 5.00                                 | 5.00                             | 658                                                                                               | 62                                                                                        | 658                                                                                          |
| 13-1-C           | 30.00                                | 60.00                            | 2744                                                                                              | 171                                                                                       | 5488                                                                                         |
| Post-TKI samples | Input DNA (ng) applied to each panel |                                  | Estimated no. of control alleles applied to panels (1) + (2) for detection of control alleles (z) | Estimated no. of T790M alleles applied to panels (1) + (2) for detection of T790M alleles | Estimated no. of control alleles applied to panels (1) + (2) for detection of T790M alleles* |
|                  | Panel for detection of control (x)   | Panel for detection of T790M (y) |                                                                                                   |                                                                                           |                                                                                              |
| 1-2-C            | 2.50                                 | 100.00                           | 1342                                                                                              | 1014                                                                                      | 53680                                                                                        |
| 2-2-F            | 3.00                                 | 100.00                           | 931                                                                                               | 899                                                                                       | 31033                                                                                        |
| 3-2-C            | 40.00                                | 40.00                            | 826                                                                                               | 477                                                                                       | 826                                                                                          |
| 4-2-C            | 12.00                                | 61.04                            | 2283                                                                                              | 4163                                                                                      | 11613                                                                                        |
| 5-2-C            | 14.00                                | 100.00                           | 1448                                                                                              | 52                                                                                        | 10343                                                                                        |
| 6-2-C            | 20.00                                | 28.82                            | 3464                                                                                              | 1175                                                                                      | 4992                                                                                         |
| 7-2-C            | 14.00                                | 58.44                            | 1324                                                                                              | 97                                                                                        | 5527                                                                                         |
| 14-2-F           | 3.00                                 | 100.00                           | 1485                                                                                              | 1542                                                                                      | 49500                                                                                        |
| 15-2-C           | 8.00                                 | 19.36                            | 2261                                                                                              | 7                                                                                         | 5472                                                                                         |
| 16-2-F           | 3.00                                 | 6.00                             | 1563                                                                                              | 947                                                                                       | 3126                                                                                         |
| 17-2-C           | 18.00                                | 94.48                            | 1552                                                                                              | 39                                                                                        | 8146                                                                                         |
| 18-2-C           | 7.44                                 | 7.44                             | 1574                                                                                              | 2                                                                                         | 1574                                                                                         |

\*Estimated number of control alleles applied to panels (1) + (2) for detection of T790M was calculated as: [estimated number of control alleles applied to panels (1) + (2) for detection of control alleles (z)] × [input DNA applied to the panel for detection of T790M (y)]/[input DNA applied to the panel for detection of control (x)].

**Supplementary Table 4.** Evaluation of DNA with NanoDrop, Qubit, and ARMS

| Pre-TKI samples  | DNA concentration |                       | ARMS C <sub>i</sub> value |                     |       |
|------------------|-------------------|-----------------------|---------------------------|---------------------|-------|
|                  | NanoDrop (ng/μL)  | Qubit (dsDNA) (ng/μL) | Control                   | Activating mutation | T790M |
| 1-1-C            | 259.10            | 54.60                 | 25.8                      | 27.15               | 34.87 |
| 2-1-C            | 22.30             | 0.13                  | 31.78                     | 34.6                | ND    |
| 3-1-C            | 117.89            | 13.90                 | 27.19                     | 29.69               | 36.09 |
| 4-1-C            | 93.96             | 16.90                 | 26.63                     | 30.58               | 35.71 |
| 5-1-C            | 43.91             | 8.66                  | 27.42                     | 32.11               | 36.25 |
| 6-1-C            | 60.70             | 0.79                  | 27.65                     | 30.85               | 36.55 |
| 7-1-C            | 8.73              | 0.95                  | 28.03                     | 30.43               | 38.31 |
| 8-1-F            | 98.82             | 89.40                 | 25.04                     | 29.26               | ND    |
| 9-1-F            | 253.51            | 95.40                 | 24.73                     | 27.69               | 39.13 |
| 10-1-F           | 157.34            | 89.40                 | 24.8                      | 26.71               | ND    |
| 11-1-F           | 135.25            | 94.80                 | 24.8                      | 31.64               | 38.3  |
| 12-1-C           | 101.05            | 12.20                 | 27.32                     | 32.48               | 32.02 |
| 13-1-C           | 37.81             | 3.28                  | 28.25                     | 35.97               | 32.19 |
| Post-TKI samples | DNA concentration |                       | ARMS C <sub>i</sub> value |                     |       |
|                  | NanoDrop (ng/μL)  | Qubit (dsDNA) (ng/μL) | Control                   | Activating mutation | T790M |
| 1-2-C            | 173.60            | 50.80                 | 24.87                     | 30.11               | 31.35 |
| 2-2-F            | 207.60            | 352.00                | 24.88                     | 29.85               | 32.06 |
| 3-2-C            | 26.24             | 3.62                  | 28.65                     | 30.26               | 31.85 |
| 4-2-C            | 30.52             | 7.16                  | 26.47                     | 30.82               | 29.07 |
| 5-2-C            | 57.95             | 11.40                 | 27.08                     | 32.49               | 33.53 |
| 6-2-C            | 14.41             | 1.93                  | 27.02                     | 28.37               | 29.88 |
| 7-2-C            | 29.22             | 5.32                  | 27.45                     | 32.87               | 33.94 |
| 14-2-F           | 528.60            | 724.00                | 24.5                      | 28.82               | 31.34 |
| 15-2-C           | 9.68              | 3.12                  | 26.41                     | 30.82               | ND    |
| 16-2-F           | 95.63             | 83.00                 | 24.59                     | 27.32               | 27.39 |
| 17-2-C           | 47.24             | 6.82                  | 27.63                     | 27.85               | 36.61 |
| 18-2-C           | 3.72              | 0.98                  | 27.61                     | 32.28               | ND    |

ND, not detectable.
